# Supplementary material for: Effect of fuel content on luminescence and antibacterial properties of zinc oxide nanocrystalline powders synthesized by the combustion method
Source: Royal Society of Chemistry journal article supplement (doi:10.1039/c6ra22341a), 2016-01-01
Supplement: c6ra22341a1.pdf [file c6ra22341a1.pdf]

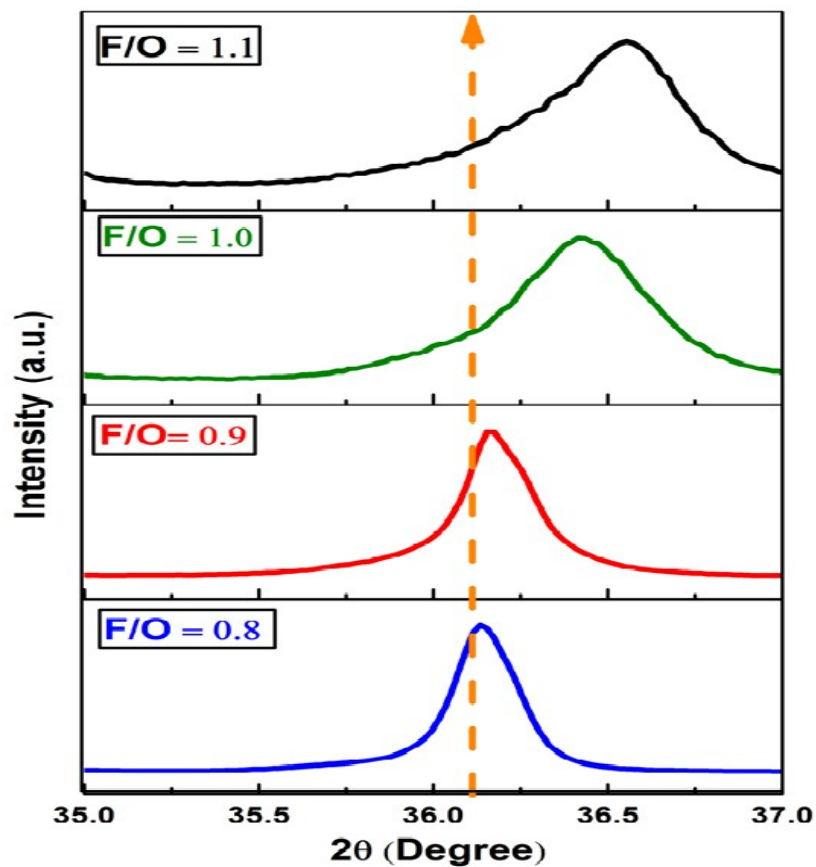

Fig.1 Shift in XRD pattern (101) peak at different F/O (Urea) ratio.

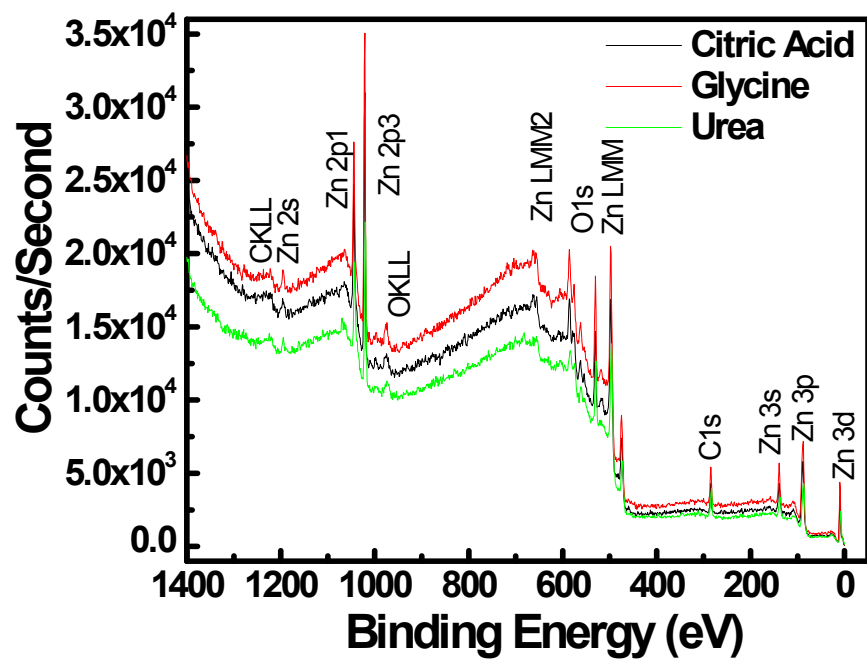

Fig.2 XPS survey diagram of ZnO synthesis with different fuels.

|                                                                                   |                                                                                   |                                                                                    |                                                                                     |
|-----------------------------------------------------------------------------------|-----------------------------------------------------------------------------------|------------------------------------------------------------------------------------|-------------------------------------------------------------------------------------|
|  |  |  |  |
| <i>E coli</i>                                                                     | <i>E coli</i> ZnO with Citric Acid                                                | <i>E coli</i> ZnO with Glycine                                                     | <i>E coli</i> ZnO with Urea                                                         |
|  |  |  |  |
| <i>S aureus</i>                                                                   | <i>S aureus</i> ZnO with Citric Acid                                              | <i>S aureus</i> ZnO with Glycine                                                   | <i>S aureus</i> ZnO with Urea                                                       |

**Fig. 3** Antibacterial studies of ZnO produced by the combustion method on *E. coli* and *S. aureus*.
